# Supplementary material for: Hierarchical mesoporous organic polymer with an intercalated metal complex for the efficient synthesis of cyclic carbonates from flue gas
Source: Royal Society of Chemistry journal article supplement (doi:10.1039/c6gc02367c), 2016-01-01
Supplement: c6gc02367c1.pdf [file c6gc02367c1.pdf]

## Supporting Information

# **Hierarchical mesoporous organic polymer with intercalated metal complex for efficient synthesis of cyclic carbonates from flue gas**

Jian Chen<sup>ab</sup>, He Li<sup>a\*</sup>, Mingmei Zhong<sup>ab</sup> and Qihua Yang<sup>a\*</sup>

<sup>a</sup> *State Key Laboratory of Catalysis, iChEM, Dalian Institute of Chemical Physics,  
Chinese Academy of Sciences, 457 Zhongshan Road, Dalian 116023, China*

<sup>b</sup> *University of Chinese Academy of Sciences, Beijing 100049, China*

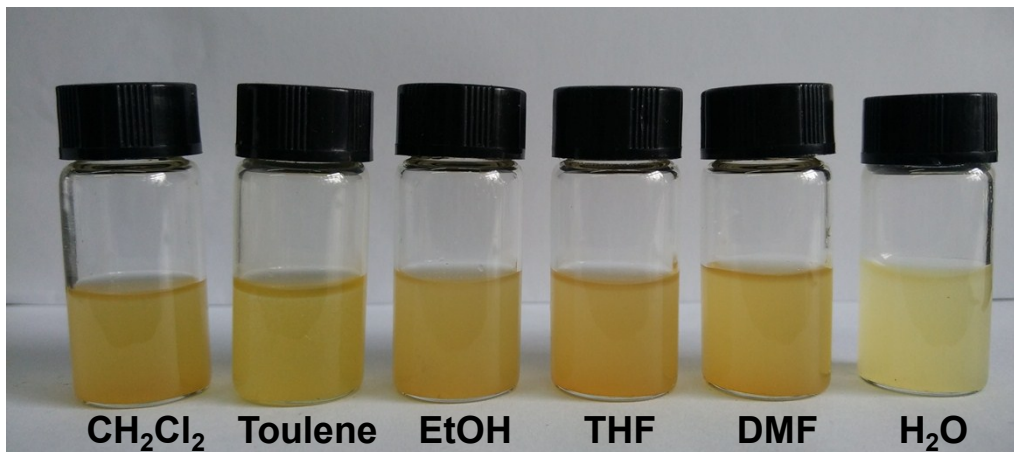

Figure S1. Dispersity of Bp-Zn@MA in common solvents.

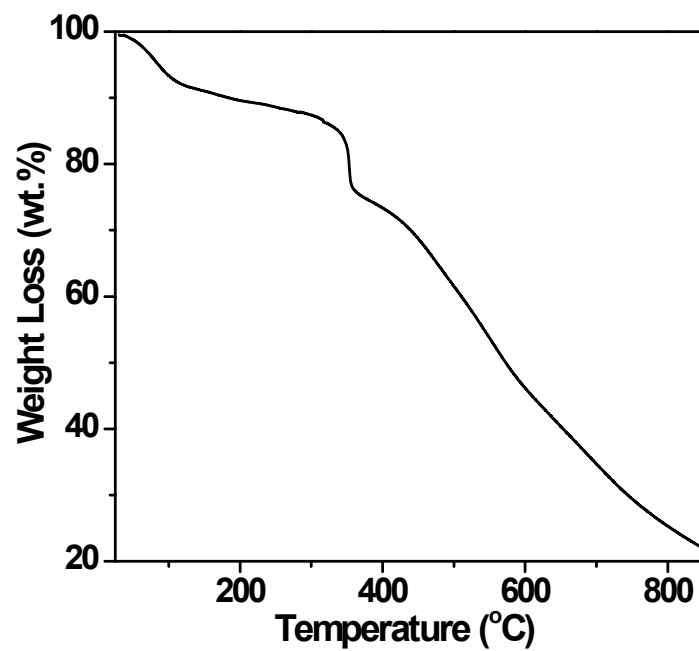

Figure S2. TG curve of Bp-Zn@MA analysed under nitrogen atmosphere.

### Calculation of Henry's law selectivity

To calculate the Henry's law selectivity of CO<sub>2</sub> over N<sub>2</sub> at 273 K or 298 K for Bp-Zn@MA, the CO<sub>2</sub> and N<sub>2</sub> isotherms were fitted to a virial-type thermal equation previously used to model gas adsorption on solid adsorbents as literature reported:

$$\ln p = \ln q + \frac{1}{T} \sum_{i=0}^m a_i q^i + \sum_{j=0}^n b_j q^j$$

p is the pressure, q is the amount of the adsorbed gas (mmol/g), and T is the temperature (K). a<sub>i</sub> and b<sub>i</sub> are virial coefficients, m and n are the numbers of coefficients required for sufficient description of the isotherms. Then the Henry's constant (K<sub>H</sub>) can be obtained:

$$K_H = \exp(-b_0) * \exp\left(-\frac{a_0}{T}\right)$$

The Henry's law selectivity can be calculated by using the following equation:

$$S_{CO_2/N_2} = K_H(CO_2) / K_H(N_2)$$

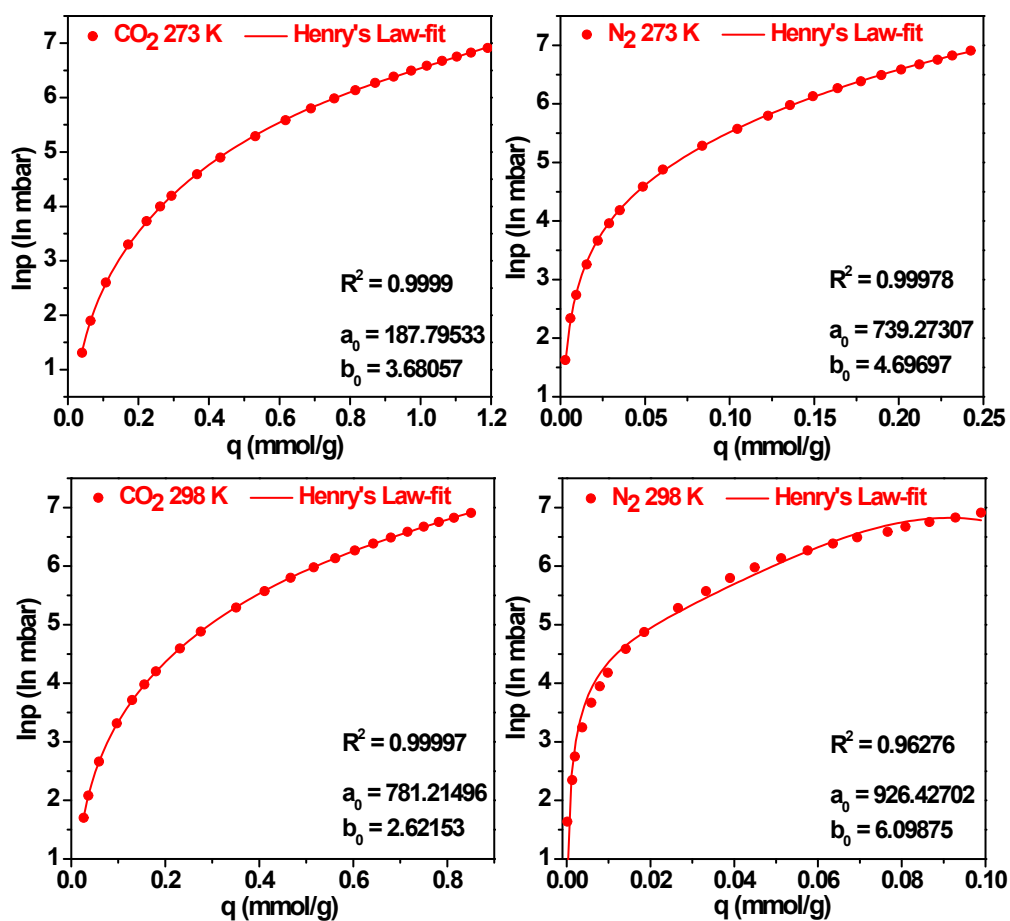

Figure S3.  $\text{CO}_2$ ,  $\text{N}_2$  adsorption isotherms and their Henry's law equation fit curves of

Bp-Zn@MA.

### Calculation of Ideal adsorbed solution theory (IAST) selectivity

To calculate the IAST selectivity of CO<sub>2</sub> over N<sub>2</sub> at 273 K or 298 K for Bp-Zn@MA, the pure component isotherms of CO<sub>2</sub> measured at 273 K or 298 K were fitted with the dual site Langmuir model and the pure component isotherms of N<sub>2</sub> measured at 273 K or 298 K were fitted with the single site Langmuir model as literature reported. The single site Langmuir model is defined as:

$$q = \frac{q_{sat}bp}{1 + bp}$$

The dual site Langmuir model is defined as:

$$q = q_A + q_B = \frac{q_{sat,A}b_Ap}{1 + b_Ap} + \frac{q_{sat,B}b_Bp}{1 + b_Bp}$$

q is molar loading of adsorbate; q<sub>sat</sub> is the saturation loading; b is Langmuir constant; A and B is referring to two distinct adsorption sites.

For the CO<sub>2</sub>:N<sub>2</sub> (15:85) gas mixtures, the IAST selectivity can be calculated using the following equation:

$$S = \frac{q_1/q_2}{p_1/p_2}$$

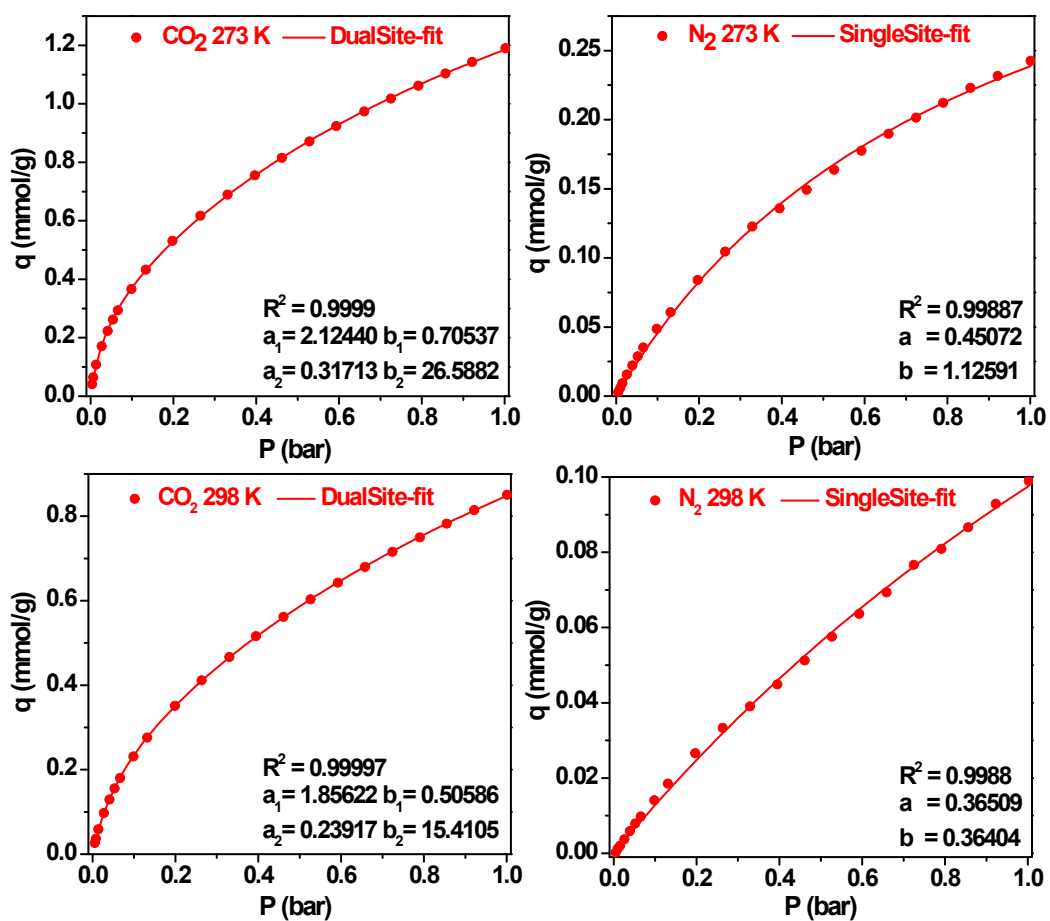

**Figure S4.** CO<sub>2</sub>, N<sub>2</sub> adsorption isotherms and their IAST equation fit curves of Bp-

Zn@MA.

**Table S1.** Comparison of the activity of Bp-Zn@MA in the PO-to-PC conversion reaction with the reported MOFs or POPs catalysts.

| Catalyst    | S/C  | TBAB<br>(x mol%) | T<br>(°C) | Pressure<br>(MPa) | Time<br>(h) | Yield<br>(%) | TOF<br>(h <sup>-1</sup> ) | Ref.      |
|-------------|------|------------------|-----------|-------------------|-------------|--------------|---------------------------|-----------|
| Bp-Zn@MA    | 1160 | 0.55             | 100       | 1                 | 1.5         | 99           | 2252                      | this work |
| Co-MON      | 2000 | 0.15             | 60        | 1                 | 12          | 75           | 125                       | 1         |
| Co-CMP      | 205  | 7.2              | 100       | 3                 | 1           | 98.1         | 201                       | 2         |
| Zn(Por)OP   | 1000 | 5                | 120       | 3                 | 2.5         | 95           | 1628                      | 3         |
| Al-CMP      | 2000 | 0.5              | 100       | 3                 | 5           | 91           | 364                       | 4         |
| Zn/HAzo-POP | 1600 | 7.2              | 100       | 3                 | 0.5         | 90           | 2888                      | 5         |
| Zn@SBMMP    | 250  | 1.8              | 80        | 2                 | 4           | 97           | -                         | 6         |
| In-MOF      | 770  | 2.5              | 80        | 2                 | 4           | 57.2         | 110                       | 7         |
| Zn-CMP      | 2000 | 1.25             | 120       | 3                 | 1           | 55.3         | 1100                      | 8         |
| PSIL-4      | 148  | -                | 110       | 6                 | 7           | 97.4         | -                         | 9         |
| T-IM        | 1540 | -                | 150       | 1                 | 10          | 87           | 134                       | 10        |
| Bp-Zn@MA    | 1160 | 0.55             | 25        | 0.1               | 48          | 99           | 128                       | this work |
| Zn-CMP      | 500  | 1.8              | 25        | 0.1               | 48          | 76.1         | 8                         | 8         |
| Co-CMP      | 205  | 7.2              | 25        | 0.1               | 48          | 81.5         | -                         | 2         |
| MMCF-2      | 800  | 1.8              | r.t       | 0.1               | 48          | 95.4         | -                         | 11        |
| Cu-MOF      | 500  | 10               | r.t       | 0.1               | 48          | 96           | 200                       | 12        |
| HKUST-1     | 500  | 10               | r.t       | 0.1               | 48          | 65           | 135                       | 12        |
| In-MOF      | 435  | 5                | r.t       | 0.1               | 48          | 77.9         | 7.1                       | 7         |

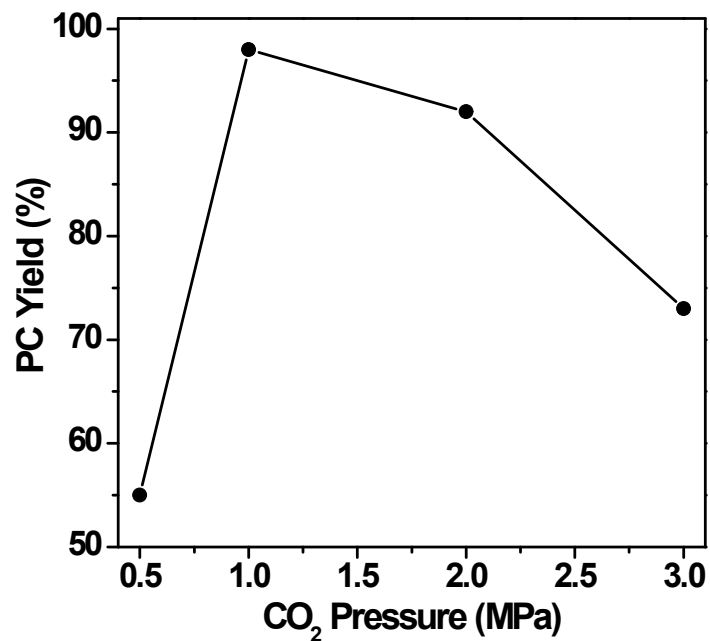

**Figure S5.** Dependence of PC yields on the pressure (pure CO<sub>2</sub>). Reaction conditions: PO (390 mg), Bp-Zn@MA (20 mg, 5.8  $\mu$ mol) and TBAB (12 mg, 37  $\mu$ mol), 100 °C, 1.5 h.

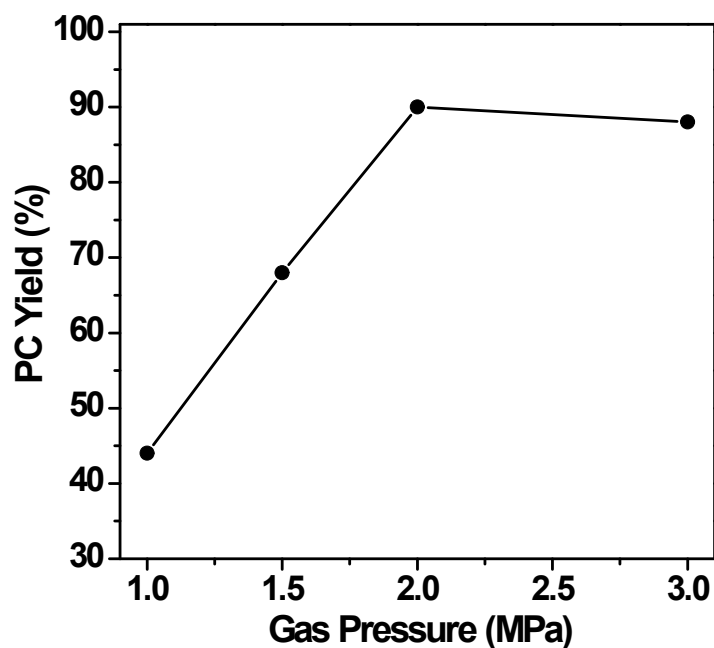

**Figure S6.** Dependence of PC yields on the pressure (diluted CO<sub>2</sub>, 20% CO<sub>2</sub> in N<sub>2</sub>). Reaction conditions: PO (390 mg), Bp-Zn@MA (20 mg, 5.8  $\mu$ mol) and TBAB (12 mg, 37  $\mu$ mol), 100 °C, 4 h.



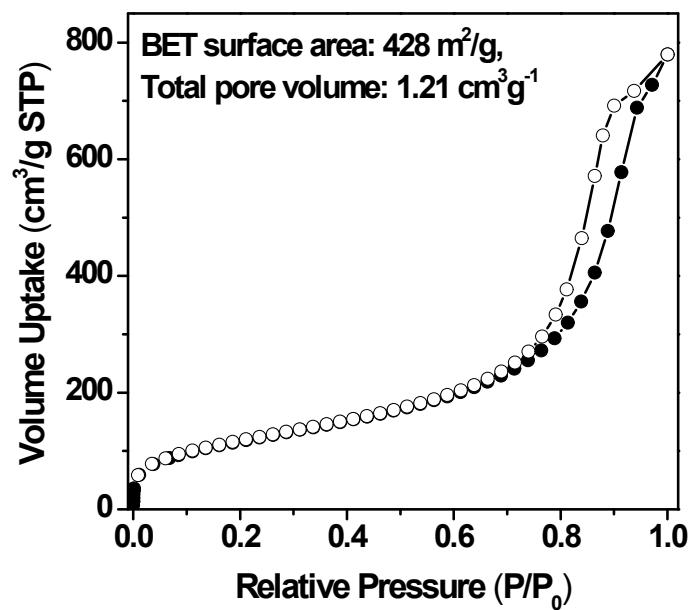

**Figure S7.** N<sub>2</sub> sorption isotherms of Bp-Zn@MA after 5<sup>th</sup> catalytic cycle measure at

77 K.

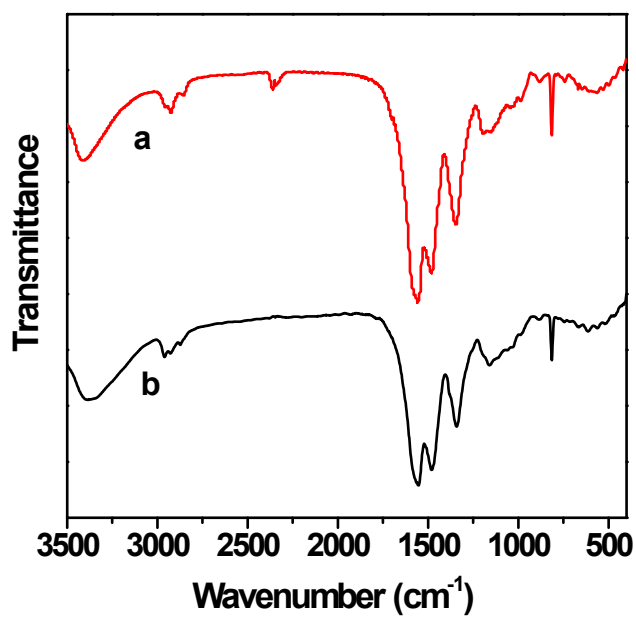

**Figure S8.** FT-IR spectra of (a) the fresh Bp-Zn@MA and (b) Bp-Zn@MA after 5<sup>th</sup> catalytic cycle.

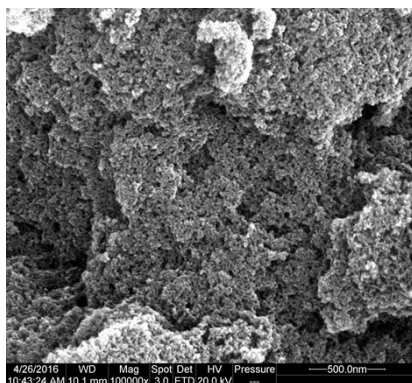

**Figure S9.** SEM image of the Bp-Zn@MA after 5<sup>th</sup> catalytic cycle.

**Table S2.** CHN Elemental analysis and ICP result of zinc for the fresh and reused Bp-Zn@MA.

| Sample                  | CHN elemental analysis |         |         | Zn content (wt%) |
|-------------------------|------------------------|---------|---------|------------------|
|                         | C (wt%)                | H (wt%) | N (wt%) |                  |
| Bp-Zn@MA                | 32.2                   | 4.54    | 40.6    | 1.9              |
| Bp-Zn@MA after 5 cycles | 34.2                   | 4.17    | 41.1    | 1.8              |

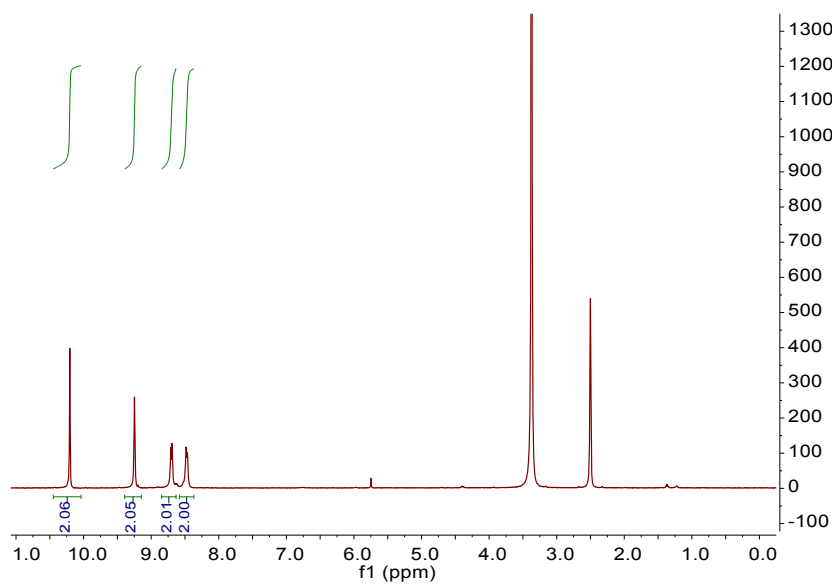

**Figure S10.** <sup>1</sup>H-NMR spectrum of 2,2'-bipyridine-5,5'-dicarboxaldehyde zinc bromide.

## References of Supporting Information.

- [1] J. Chun, S. Kang, N. Kang, S. M. Lee, H. J. Kim and S. U. Son, *J. Mater. Chem. A*, 2013, **1**, 5517.
- [2] Y. Xie, T. T. Wang, X. H. Liu, K. Zou and W. Q. Deng, *Nat. Commun.*, 2013, **4**, 1960.
- [3] A. Chen, Y. Zhang, J. Chen, L. Chen and Y. Yu, *J. Mater. Chem. A*, 2015, **3**, 9807.
- [4] X. Sheng, H. Guo, Y. Qin, X. Wang and F. Wang, *RSC Adv.*, 2015, **5**, 31664.
- [5] G. Ji, Z. Yang, H. Zhang, Y. Zhao, B. Yu, Z. Ma and Z. Liu, *Angew. Chem. Int. Ed.*, 2016, **55**, 9685.
- [6] S. Bhunia, R. A. Molla, V. Kumari, S. M. Islam and A. Bhaumik, *Chem. Commun.*, 2015, **51**, 15732.
- [7] L. Liu, S. M. Wang, Z. B. Han, M. Ding, D. Q. Yuan and H. L. Jiang, *Inorg. Chem.*, 2016, **55**, 3558.
- [8] Y. Xie, T. T. Wang, R. X. Yang, N. Y. Huang, K. Zou and W. Q. Deng, *ChemSusChem*, 2014, **7**, 2110.
- [9] Y. Xie, Z. Zhang, T. Jiang, J. He, B. Han, T. Wu and K. Ding, *Angew. Chem. Int. Ed.*, 2007, **46**, 7255.
- [10] H. C. Cho, H. S. Lee, J. Chun, S. M. Lee, H. J. Kim and S. U. Son, *Chem. Commun.*, 2011, **47**, 917.
- [11] W. Y. Gao, Y. Chen, Y. Niu, K. Williams, L. Cash, P. J. Perez, L. Wojtas, J. Cai, Y. S. Chen and S. Ma, *Angew. Chem. Int. Ed.*, 2014, **53**, 2615.
- [12] P. Z. Li, X. J. Wang, J. Liu, J. S. Lim, R. Zou and Y. Zhao, *J. Am. Chem. Soc.*, 2016, **138**, 2142.
